# Supplementary material for: The Halogen Bond in Weakly Bonded Complexes and the Consequences for Aromaticity and Spin-Orbit Coupling
Source: MDPI journal article supplement (doi:10.3390/molecules28020772), 2023-01-12
Supplement: s1 [file s1]

# 1 Supplementary Information

## 1.1 Optimized geometries

In this part of the document the geometries (in Å) of all optimized complexes are shown.

Table S1: Geometry optimization with QZ4P basis of C2F3Br furan perpendicular

| Atoms | x             | y             | z             |
|-------|---------------|---------------|---------------|
| C     | 3.015 064 93  | 1.165 218 32  | 0.050 606 11  |
| O     | 3.594 174 32  | 0.674 819 43  | −1.066 251 34 |
| H     | 4.502 513 59  | −1.106 649 82 | −1.574 766 08 |
| H     | 3.935 175 70  | −1.821 549 56 | 1.001 359 30  |
| H     | 2.680 339 56  | 0.376 813 28  | 2.047 488 74  |
| H     | 2.627 866 40  | 2.166 243 43  | −0.017 659 45 |
| C     | −2.847 512 35 | 0.408 073 85  | 0.106 552 95  |
| C     | −1.939 369 56 | −0.482 932 53 | −0.251 998 26 |
| F     | −2.572 424 47 | 1.555 984 83  | 0.666 787 56  |
| F     | −4.133 984 80 | 0.235 927 94  | −0.060 951 08 |
| F     | −2.317 016 27 | −1.622 042 84 | −0.813 466 64 |
| Br    | −0.115 973 04 | −0.247 210 76 | −0.014 690 34 |

Table S2: Geometry optimization with QZ4P basis of C2F3Br furan parallel

| Atoms | x             | y             | z             |
|-------|---------------|---------------|---------------|
| C     | 3.596 272 11  | −1.014 976 19 | 0.033 078 33  |
| O     | 2.659 664 24  | −0.039 159 53 | −0.001 128 82 |
| H     | 2.703 387 20  | 2.024 031 46  | −0.061 933 35 |
| H     | 5.416 511 77  | 1.696 208 03  | −0.037 839 77 |
| H     | 5.766 415 03  | −1.018 427 66 | 0.044 128 91  |
| H     | 3.225 309 60  | −2.023 994 20 | 0.060 824 80  |
| C     | −3.015 837 86 | 0.569 212 52  | 0.020 249 46  |
| C     | −2.190 523 28 | −0.462 261 63 | −0.020 161 34 |
| F     | −2.633 291 64 | 1.817 235 22  | 0.073 603 19  |
| F     | −4.319 290 80 | 0.451 407 42  | 0.010 253 59  |
| F     | −2.675 709 23 | −1.694 351 32 | −0.073 939 50 |
| Br    | −0.344 514 63 | −0.312 430 29 | −0.006 552 45 |

Table S3: Geometry optimization with QZ4P basis of C2F3Br selenophene parallel

| Atoms | x             | y             | z             |
|-------|---------------|---------------|---------------|
| C     | 3.164 725 21  | −1.124 319 18 | 0.359 465 70  |
| Se    | 2.847 814 71  | −0.016 115 51 | −1.088 466 91 |
| H     | 2.729 819 58  | 2.415 421 97  | −0.253 893 29 |
| H     | 3.162 134 05  | 1.675 642 65  | 2.197 892 87  |
| H     | 3.450 353 07  | −0.888 734 26 | 2.466 325 35  |
| H     | 3.247 787 07  | −2.190 911 47 | 0.228 587 74  |
| C     | −3.300 633 39 | 0.568 873 10  | 0.169 081 08  |
| C     | −2.394 060 91 | −0.375 939 12 | 0.348 361 85  |
| F     | −3.059 793 06 | 1.725 703 03  | −0.388 112 78 |
| F     | −4.551 886 92 | 0.446 968 24  | 0.533 903 91  |
| F     | −2.737 725 03 | −1.518 954 17 | 0.924 649 52  |
| Br    | −0.619 457 74 | −0.219 865 02 | −0.161 694 51 |

Table S4: Geometry optimization with QZ4P basis of C2F3Br selenophene  
perpendicular

| Atoms | x             | y             | z             |
|-------|---------------|---------------|---------------|
| C     | -2.896 291 60 | -0.789 585 22 | 1.117 496 85  |
| Se    | -2.961 539 64 | -0.609 625 79 | -0.720 684 20 |
| H     | -2.304 460 81 | 1.802 421 40  | -1.333 779 76 |
| H     | -1.971 757 57 | 2.429 072 57  | 1.163 865 36  |
| H     | -2.429 765 38 | 0.459 932 71  | 2.791 720 93  |
| H     | -3.134 448 11 | -1.730 755 92 | 1.585 569 68  |
| C     | 3.310 777 97  | -0.794 545 46 | 0.169 189 76  |
| C     | 2.729 559 94  | 0.366 423 44  | -0.078 023 01 |
| F     | 2.673 123 97  | -1.878 269 73 | 0.522 589 17  |
| F     | 4.603 155 04  | -0.986 330 87 | 0.085 586 40  |
| F     | 3.467 290 53  | 1.409 903 23  | -0.431 745 00 |
| Br    | 0.903 468 99  | 0.659 920 98  | 0.033 941 78  |

Table S5: Geometry optimization with QZ4P basis of C2F3Br thiophene  
perpendicular

| Atoms | x             | y             | z             |
|-------|---------------|---------------|---------------|
| C     | -3.781 697 24 | -0.288 233 97 | -1.175 436 34 |
| S     | -3.361 544 97 | 1.198 545 73  | -0.459 010 47 |
| H     | -2.395 668 94 | 1.018 868 93  | 1.767 207 14  |
| H     | -2.619 708 32 | -1.595 025 47 | 1.660 812 47  |
| H     | -3.679 432 59 | -2.367 861 57 | -0.617 945 09 |
| H     | -4.216 243 43 | -0.312 786 81 | -2.161 262 92 |
| C     | 3.148 466 15  | 0.452 908 79  | 0.223 593 66  |
| C     | 2.252 795 47  | -0.220 224 82 | -0.477 660 67 |
| F     | 2.854 944 08  | 1.311 755 33  | 1.163 291 43  |
| F     | 4.440 135 02  | 0.329 852 84  | 0.052 327 39  |
| F     | 2.648 812 01  | -1.073 126 53 | -1.410 889 70 |
| Br    | 0.423 119 86  | -0.061 015 80 | -0.236 370 55 |

Table S6: Geometry optimization with QZ4P basis of C2F3Br thiophene parallel

| Atoms | x             | y             | z             |
|-------|---------------|---------------|---------------|
| C     | 3.602 103 53  | −1.051 778 53 | −0.175 890 15 |
| S     | 2.795 939 57  | 0.199 988 12  | −1.006 259 27 |
| H     | 2.961 018 05  | 2.389 694 70  | 0.042 058 89  |
| H     | 4.419 128 54  | 1.362 856 07  | 1.970 227 36  |
| H     | 4.781 961 02  | −1.216 209 38 | 1.619 327 73  |
| H     | 3.584 909 79  | −2.057 545 88 | −0.562 474 83 |
| C     | −3.194 561 96 | 0.456 776 06  | −0.133 909 33 |
| C     | −2.308 829 13 | −0.315 018 62 | 0.471 807 01  |
| F     | −2.889 696 69 | 1.414 547 66  | −0.967 921 71 |
| F     | −4.487 048 10 | 0.342 254 84  | 0.036 623 67  |
| F     | −2.715 636 29 | −1.264 866 45 | 1.300 386 34  |
| Br    | −0.477 796 53 | −0.169 749 24 | 0.226 173 20  |

Table S7: Geometry optimization with QZ4P basis of C2F3Cl furan perpendicular

| Atoms | x             | y             | z             |
|-------|---------------|---------------|---------------|
| C     | 3.338 247 50  | 1.283 677 20  | 0.073 572 48  |
| O     | 3.682 476 72  | 0.587 109 27  | −1.031 050 25 |
| H     | 3.825 226 29  | −1.415 392 84 | −1.505 798 06 |
| H     | 3.021 323 25  | −1.808 681 72 | 1.076 373 36  |
| H     | 2.713 609 69  | 0.722 867 60  | 2.076 494 09  |
| H     | 3.367 570 77  | 2.354 956 72  | −0.015 132 26 |
| C     | −2.713 063 24 | 0.427 309 16  | −0.246 073 52 |
| C     | −1.966 501 96 | −0.528 193 50 | 0.281 212 10  |
| F     | −2.237 795 21 | 1.528 337 08  | −0.763 041 15 |
| F     | −4.018 538 25 | 0.369 231 40  | −0.307 651 74 |
| F     | −2.535 563 74 | −1.613 954 72 | 0.782 611 11  |
| Cl    | −0.279 366 19 | −0.470 689 36 | 0.367 227 12  |

Table S8: Geometry optimization with QZ4P basis of C2F3Cl furan parallel

| Atoms | x             | y             | z             |
|-------|---------------|---------------|---------------|
| C     | -3.433 524 60 | -1.043 244 01 | -0.002 684 57 |
| O     | -2.507 946 81 | -0.057 449 19 | -0.006 304 20 |
| H     | -2.574 139 67 | 2.005 349 05  | -0.006 812 93 |
| H     | -5.283 788 05 | 1.648 139 06  | 0.009 488 92  |
| H     | -5.604 014 32 | -1.071 647 13 | 0.009 939 01  |
| H     | -3.051 420 67 | -2.048 498 81 | -0.005 646 22 |
| C     | 3.016 379 77  | 0.504 418 76  | 0.002 145 18  |
| C     | 2.182 379 22  | -0.521 501 06 | -0.000 811 45 |
| F     | 2.639 252 45  | 1.755 323 60  | 0.006 712 82  |
| F     | 4.318 115 57  | 0.375 491 17  | 0.000 810 45  |
| F     | 2.654 669 31  | -1.759 189 62 | -0.001 369 63 |
| Cl    | 0.499 451 50  | -0.373 299 53 | -0.003 960 60 |

Table S9: Geometry optimization with QZ4P basis of C2F3Cl selenophene parallel

| Atoms | x             | y             | z             |
|-------|---------------|---------------|---------------|
| C     | -4.398 489 48 | -0.859 650 90 | 0.788 373 47  |
| Se    | -2.823 100 69 | -0.374 539 19 | -0.047 194 51 |
| H     | -3.268 351 22 | 1.695 276 79  | -1.506 026 16 |
| H     | -5.770 454 00 | 1.744 926 46  | -0.808 678 31 |
| H     | -6.417 488 12 | -0.149 581 51 | 0.841 512 42  |
| H     | -4.431 796 91 | -1.709 446 99 | 1.450 601 86  |
| C     | 3.829 734 38  | 0.984 021 39  | 0.040 404 34  |
| C     | 4.322 315 17  | -0.230 039 65 | 0.219 226 41  |
| F     | 3.009 495 90  | 1.306 864 32  | -0.922 730 99 |
| F     | 4.115 620 09  | 1.996 928 45  | 0.815 683 63  |
| F     | 5.150 595 92  | -0.471 736 00 | 1.222 763 87  |
| Cl    | 3.963 999 19  | -1.548 127 87 | -0.774 969 16 |

Table S10: Geometry optimization with QZ4P basis of C2F3Cl thiophene parallel

| Atoms | x             | y             | z             |
|-------|---------------|---------------|---------------|
| C     | 3.456 508 97  | −1.187 025 56 | −0.422 846 10 |
| S     | 3.155 374 72  | 0.303 965 59  | −1.189 572 28 |
| H     | 2.451 465 33  | 2.091 634 70  | 0.301 962 50  |
| H     | 2.611 147 64  | 0.455 223 48  | 2.350 149 74  |
| H     | 3.377 813 89  | −1.943 205 19 | 1.594 383 15  |
| H     | 3.773 372 62  | −2.040 718 48 | −0.999 096 30 |
| C     | −3.036 974 30 | 0.620 309 18  | 0.161 507 77  |
| C     | −2.131 238 63 | −0.328 876 85 | −0.003 050 64 |
| F     | −2.780 155 37 | 1.800 414 31  | 0.660 177 49  |
| F     | −4.296 868 55 | 0.477 999 68  | −0.160 441 76 |
| F     | −2.483 193 08 | −1.497 214 55 | −0.518 569 12 |
| Cl    | −0.499 585 61 | −0.161 095 84 | 0.402 507 34  |

Table S11: Geometry optimization with QZ4P basis of C2F3Cl thiophene per-pendicular

| Atoms | x             | y             | z             |
|-------|---------------|---------------|---------------|
| C     | 2.948 526 72  | 1.183 436 99  | 0.083 144 31  |
| S     | 3.108 250 38  | 0.055 357 62  | −1.182 958 01 |
| H     | 2.986 489 03  | −2.274 132 62 | −0.491 464 48 |
| H     | 2.656 864 08  | −1.524 808 94 | 2.002 451 54  |
| H     | 2.654 892 83  | 1.096 284 66  | 2.216 575 03  |
| H     | 2.986 029 84  | 2.240 673 16  | −0.122 036 21 |
| C     | −2.767 518 70 | 0.721 116 54  | 0.068 774 96  |
| C     | −2.129 665 21 | −0.427 970 98 | −0.075 902 55 |
| F     | −2.192 274 68 | 1.839 339 92  | 0.422 853 88  |
| F     | −4.053 253 37 | 0.861 836 46  | −0.128 129 30 |
| F     | −2.796 875 26 | −1.514 106 55 | −0.437 695 14 |
| Cl    | −0.471 588 62 | −0.628 154 42 | 0.175 375 20  |

Table S12: Geometry optimization with QZ4P basis of C2F3I furan perpendicular

| Atoms | x             | y             | z             |
|-------|---------------|---------------|---------------|
| C     | -3.152 151 12 | 1.180 000 12  | 0.007 832 31  |
| O     | -3.765 391 79 | 0.667 472 10  | 1.094 765 61  |
| H     | -4.698 269 87 | -1.119 949 50 | 1.534 742 40  |
| H     | -4.063 605 25 | -1.777 878 91 | -1.040 138 64 |
| H     | -2.778 437 47 | 0.441 725 66  | -2.003 192 83 |
| H     | -2.766 953 05 | 2.179 270 69  | 0.107 671 45  |
| C     | 3.026 954 18  | 0.406 538 09  | 0.198 423 74  |
| C     | 2.105 791 54  | -0.510 572 14 | -0.046 180 24 |
| F     | 2.778 499 65  | 1.680 231 04  | 0.354 479 66  |
| F     | 4.304 101 24  | 0.141 714 49  | 0.312 555 98  |
| F     | 2.482 522 33  | -1.778 895 10 | -0.186 515 40 |
| I     | 0.091 154 85  | -0.114 324 01 | -0.231 654 23 |

Table S13: Geometry optimization with QZ4P basis of C2F3I furan parallel

| Atoms | x             | y             | z             |
|-------|---------------|---------------|---------------|
| C     | 3.779 072 02  | -1.006 775 10 | 0.019 385 79  |
| O     | 2.809 211 26  | -0.062 243 43 | -0.008 488 78 |
| H     | 2.781 875 86  | 2.002 642 84  | -0.047 544 57 |
| H     | 5.504 518 80  | 1.766 770 62  | -0.014 917 38 |
| H     | 5.947 046 48  | -0.934 687 43 | 0.040 938 08  |
| H     | 3.442 388 10  | -2.027 954 10 | 0.034 777 77  |
| C     | -3.094 846 59 | 0.623 349 05  | 0.021 261 67  |
| C     | -2.301 571 76 | -0.434 281 97 | -0.020 046 10 |
| F     | -2.674 880 67 | 1.860 268 36  | 0.071 080 02  |
| F     | -4.401 998 76 | 0.552 074 62  | 0.016 893 50  |
| F     | -2.848 811 96 | -1.646 385 12 | -0.069 217 94 |
| I     | -0.246 362 75 | -0.344 898 55 | -0.013 506 34 |

Table S14: Geometry optimization with QZ4P basis of C2F3I selenophene parallel

| Atoms | x             | y             | z             |
|-------|---------------|---------------|---------------|
| C     | 3.279 702 23  | −1.147 676 93 | 0.672 251 17  |
| Se    | 3.081 404 83  | −0.348 450 90 | −0.987 110 82 |
| H     | 2.906 623 00  | 2.198 506 51  | −0.657 779 65 |
| H     | 3.144 823 81  | 1.959 003 45  | 1.917 285 33  |
| H     | 3.400 709 72  | −0.499 405 81 | 2.706 167 67  |
| H     | 3.365 818 91  | −2.218 415 30 | 0.760 014 67  |
| C     | −3.106 322 00 | 0.584 172 53  | 0.623 411 90  |
| C     | −2.483 818 37 | −0.359 883 36 | −0.062 521 53 |
| F     | −2.518 086 79 | 1.630 260 47  | 1.142 022 44  |
| F     | −4.393 869 20 | 0.581 139 10  | 0.862 636 20  |
| F     | −3.193 412 71 | −1.378 727 38 | −0.542 365 00 |
| I     | −0.459 560 53 | −0.373 157 28 | −0.449 298 81 |

Table S15: Geometry optimization with QZ4P basis of C2F3I selenophene per-pendicular

| Atoms | x             | y             | z             |
|-------|---------------|---------------|---------------|
| C     | 3.077 630 57  | 0.854 885 43  | 1.125 711 59  |
| Se    | 3.188 376 44  | 0.668 415 61  | −0.709 279 00 |
| H     | 2.548 437 51  | −1.746 253 37 | −1.328 820 66 |
| H     | 2.152 380 01  | −2.363 240 90 | 1.165 014 26  |
| H     | 2.563 944 26  | −0.385 100 53 | 2.793 442 19  |
| H     | 3.302 553 91  | 1.798 051 28  | 1.596 399 53  |
| C     | −3.333 071 81 | 0.898 232 21  | 0.158 888 20  |
| C     | −2.771 710 54 | −0.276 242 00 | −0.075 563 56 |
| F     | −2.673 634 99 | 1.985 075 23  | 0.463 376 06  |
| F     | −4.624 705 24 | 1.109 210 10  | 0.112 362 30  |
| F     | −3.553 076 58 | −1.311 378 47 | −0.376 607 62 |
| I     | −0.744 687 86 | −0.635 758 49 | −0.002 287 45 |



Table S16: Geometry optimization with QZ4P basis of C2F3I thiophene parallel

| Atoms | x             | y             | z             |
|-------|---------------|---------------|---------------|
| C     | 3.570 127 16  | −1.114 577 52 | 0.514 958 51  |
| S     | 3.415 995 64  | −0.574 319 31 | −1.095 937 39 |
| H     | 3.374 398 28  | 1.845 907 94  | −1.357 619 47 |
| H     | 3.623 015 80  | 2.137 544 64  | 1.239 458 73  |
| H     | 3.750 970 48  | −0.191 045 22 | 2.452 008 48  |
| H     | 3.593 508 86  | −2.169 363 46 | 0.733 751 39  |
| C     | −2.618 498 26 | 0.415 984 71  | 0.811 583 26  |
| C     | −2.094 434 18 | −0.170 152 32 | −0.252 010 04 |
| F     | −1.923 083 56 | 0.996 418 18  | 1.753 959 78  |
| F     | −3.905 405 48 | 0.482 358 76  | 1.044 306 83  |
| F     | −2.908 333 11 | −0.728 672 58 | −1.144 385 15 |
| I     | −0.075 242 93 | −0.289 145 32 | −0.636 671 27 |

Table S17: Geometry optimization with QZ4P basis of C2F3I thiophene perpen-dicular

| Atoms | x             | y             | z             |
|-------|---------------|---------------|---------------|
| C     | 3.378 201 23  | 1.273 980 96  | 0.545 419 60  |
| S     | 3.325 781 33  | 0.743 453 44  | −1.071 897 91 |
| H     | 3.029 482 05  | −1.656 525 76 | −1.344 112 59 |
| H     | 2.965 371 02  | −1.953 085 15 | 1.264 609 12  |
| H     | 3.235 087 89  | 0.357 627 14  | 2.491 835 11  |
| H     | 3.504 858 57  | 2.320 244 40  | 0.770 358 93  |
| C     | −2.843 286 70 | 0.870 260 46  | −0.076 931 09 |
| C     | −2.278 384 90 | −0.306 630 63 | 0.136 114 14  |
| F     | −2.183 738 79 | 1.977 590 07  | −0.295 827 40 |
| F     | −4.138 363 99 | 1.063 469 70  | −0.093 504 66 |
| F     | −3.058 800 09 | −1.364 259 43 | 0.347 513 81  |
| I     | −0.245 383 91 | −0.629 731 38 | 0.165 939 36  |

Table S18: Geometry optimization with QZ4P basis of CF3Br furan  
perpendic-ular

| Atoms | x             | y             | z             |
|-------|---------------|---------------|---------------|
| C     | -2.770 897 71 | -1.233 377 72 | 1.312 375 27  |
| O     | -2.322 954 50 | -1.937 235 84 | 0.249 905 72  |
| H     | -2.251 960 51 | -1.612 514 39 | -1.786 817 68 |
| H     | -3.427 532 06 | 0.778 036 04  | -1.174 329 87 |
| H     | -3.700 523 65 | 0.714 835 28  | 1.550 509 50  |
| H     | -2.657 496 58 | -1.705 103 02 | 2.272 128 50  |
| C     | 1.847 099 93  | 1.632 791 42  | -0.460 865 66 |
| F     | 1.791 819 09  | 2.667 011 42  | 0.361 186 77  |
| F     | 2.259 557 86  | 2.058 468 04  | -1.643 029 52 |
| F     | 2.733 154 93  | 0.770 830 78  | 0.007 591 00  |
| Br    | 0.116 218 54  | 0.804 448 62  | -0.611 865 51 |

Table S19: Geometry optimization with QZ4P basis of CF3Br furan parallel

| Atoms | x             | y             | z             |
|-------|---------------|---------------|---------------|
| C     | -3.191 671 38 | 1.090 151 04  | -0.073 290 80 |
| O     | -2.388 752 69 | 0.005 595 09  | -0.173 140 73 |
| H     | -2.684 737 13 | -2.037 103 20 | -0.133 253 49 |
| H     | -5.316 354 87 | -1.376 054 24 | 0.194 821 66  |
| H     | -5.327 932 88 | 1.362 697 24  | 0.193 926 03  |
| H     | -2.702 045 50 | 2.045 705 35  | -0.134 752 96 |
| C     | 2.581 627 85  | -0.000 614 48 | 0.032 760 04  |
| F     | 3.053 794 36  | 1.233 640 87  | 0.073 412 71  |
| F     | 3.124 173 33  | -0.624 240 15 | -0.998 955 18 |
| F     | 2.944 889 49  | -0.625 829 95 | 1.139 556 85  |
| Br    | 0.666 686 71  | 0.019 996 40  | -0.125 556 82 |

Table S20: Geometry optimization with QZ4P basis of CF<sub>3</sub>Br selenophene  
par-allel

| Atoms | x             | y             | z             |
|-------|---------------|---------------|---------------|
| C     | 2.838 867 43  | 0.255 860 61  | 1.258 716 52  |
| H     | 2.723 992 74  | 0.212 478 23  | −2.357 908 76 |
| H     | 3.724 828 24  | 2.322 989 22  | −1.223 804 07 |
| H     | 3.734 947 70  | 2.195 126 48  | 1.367 772 16  |
| H     | 2.741 261 26  | −0.014 495 99 | 2.297 517 79  |
| C     | −3.082 225 66 | 0.203 124 82  | −0.003 189 55 |
| F     | −3.423 847 85 | 0.622 075 08  | 1.203 056 59  |
| F     | −3.711 982 15 | −0.933 321 47 | −0.247 124 08 |
| F     | −3.477 401 92 | 1.101 454 01  | −0.888 301 04 |
| Se    | 2.279 119 36  | −0.895 429 09 | −0.077 496 31 |
| Br    | −1.175 334 38 | −0.052 694 57 | −0.107 180 43 |

Table S21: Geometry optimization with QZ4P basis of CF<sub>3</sub>Br selenophene  
per-pendicular

| Atoms | x             | y             | z             |
|-------|---------------|---------------|---------------|
| C     | 1.961 454 40  | 0.247 091 33  | −1.221 363 04 |
| H     | 3.521 548 74  | 0.498 034 92  | 2.029 659 93  |
| H     | 2.437 232 61  | 2.651 641 11  | 1.062 530 69  |
| H     | 1.369 889 98  | 2.305 661 31  | −1.277 450 85 |
| H     | 1.600 559 71  | −0.125 514 03 | −2.166 247 52 |
| C     | −3.078 700 41 | −0.122 131 63 | 0.116 686 84  |
| F     | −3.843 066 46 | 0.852 006 09  | −0.348 075 39 |
| F     | −3.404 956 69 | −1.243 232 89 | −0.504 512 61 |
| F     | −3.325 622 79 | −0.270 068 09 | 1.407 009 14  |
| Se    | 2.862 586 82  | −0.862 401 44 | −0.049 778 23 |
| Br    | −1.220 984 47 | 0.286 036 87  | −0.171 586 83 |

Table S22: Geometry optimization with QZ4P basis of CF3Br thiophene perpen-dicular

| Atoms | x             | y             | z             |
|-------|---------------|---------------|---------------|
| C     | 2.559 640 76  | −0.135 148 05 | −1.244 373 11 |
| S     | 3.155 501 84  | −1.168 123 17 | −0.027 967 21 |
| H     | 3.728 122 48  | −0.060 616 97 | 2.058 127 66  |
| H     | 3.007 715 34  | 2.249 892 67  | 1.041 789 32  |
| H     | 2.168 855 83  | 1.976 706 85  | −1.438 110 81 |
| H     | 2.280 547 92  | −0.528 623 75 | −2.208 032 76 |
| C     | −2.523 100 06 | −0.057 184 83 | 0.167 682 50  |
| F     | −3.227 779 00 | 0.710 077 90  | −0.646 940 88 |
| F     | −2.875 643 05 | −1.315 710 35 | −0.032 181 21 |
| F     | −2.821 120 68 | 0.269 546 73  | 1.413 748 23  |
| Br    | −0.641 803 50 | 0.172 926 26  | −0.157 011 69 |

Table S23: Geometry optimization with QZ4P basis of CF3Br thiophene parallel

| Atoms | x             | y             | z             |
|-------|---------------|---------------|---------------|
| C     | 3.229 767 25  | 0.019 557 20  | 1.242 783 50  |
| H     | 2.952 847 96  | −0.253 620 24 | −2.243 462 05 |
| H     | 4.443 688 37  | 1.716 225 53  | −1.356 259 36 |
| H     | 4.520 993 88  | 1.743 250 59  | 1.272 759 26  |
| H     | 3.083 066 75  | −0.204 961 31 | 2.286 546 70  |
| C     | −2.827 682 12 | 0.156 505 94  | −0.017 713 63 |
| F     | −3.306 087 61 | 0.505 937 14  | 1.163 544 10  |
| F     | −3.414 182 37 | −0.966 533 59 | −0.394 068 04 |
| F     | −3.128 658 86 | 1.101 642 29  | −0.891 051 72 |
| S     | 2.491 645 16  | −0.941 948 85 | 0.044 220 88  |
| Br    | −0.920 755 09 | −0.085 448 03 | 0.075 820 78  |

Table S24: Geometry optimization with QZ4P basis of CF<sub>3</sub>Cl furan  
perpendic-ular

| Atoms | x             | y             | z             |
|-------|---------------|---------------|---------------|
| C     | -3.480 956 58 | 0.221 700 44  | 0.969 695 91  |
| O     | -3.233 678 17 | -1.012 538 23 | 0.479 838 96  |
| H     | -2.448 050 61 | -1.751 347 48 | -1.278 091 35 |
| H     | -2.213 835 82 | 0.886 260 94  | -1.965 007 21 |
| H     | -3.196 134 50 | 2.235 339 57  | 0.203 219 22  |
| H     | -3.912 563 37 | 0.260 149 03  | 1.954 032 89  |
| C     | 2.337 773 12  | 0.006 303 50  | 0.071 386 98  |
| F     | 2.759 677 00  | 1.253 674 05  | -0.050 810 56 |
| F     | 2.962 014 82  | -0.737 037 25 | -0.826 599 63 |
| F     | 2.661 962 08  | -0.430 207 05 | 1.276 258 66  |
| Cl    | 0.605 826 82  | -0.076 023 00 | -0.164 839 73 |

Table S25: Geometry optimization with QZ4P basis of CF<sub>3</sub>Cl furan parallel

| Atoms | x             | y             | z             |
|-------|---------------|---------------|---------------|
| C     | -2.923 009 28 | 1.066 151 66  | -0.036 610 46 |
| O     | -2.147 242 13 | -0.039 507 35 | -0.108 114 50 |
| H     | -2.503 294 82 | -2.073 018 03 | -0.100 248 31 |
| H     | -5.126 753 43 | -1.339 817 96 | 0.110 994 64  |
| H     | -5.061 175 42 | 1.398 163 78  | 0.132 654 22  |
| H     | -2.405 541 60 | 2.008 394 96  | -0.067 167 93 |
| C     | 2.613 113 35  | 0.016 673 81  | 0.017 784 74  |
| F     | 3.034 160 73  | 1.270 509 21  | -0.001 179 66 |
| F     | 3.140 641 41  | -0.618 095 70 | -1.015 552 96 |
| F     | 3.049 684 24  | -0.554 828 59 | 1.127 682 42  |
| Cl    | 0.867 824 26  | -0.041 545 51 | -0.054 063 37 |

Table S26: Geometry optimization with QZ4P basis of CF<sub>3</sub>Cl selenophene  
par-allel

| Atoms | x             | y             | z             |
|-------|---------------|---------------|---------------|
| C     | -2.497 456 06 | -0.019 777 29 | 1.209 963 89  |
| H     | -2.541 167 80 | -0.148 538 20 | -2.404 086 40 |
| H     | -2.491 467 08 | -2.413 613 37 | -1.132 215 92 |
| H     | -2.460 830 48 | -2.146 013 40 | 1.448 079 21  |
| H     | -2.486 897 13 | 0.330 961 74  | 2.229 110 57  |
| C     | 2.645 385 96  | -0.373 057 24 | 0.029 822 65  |
| F     | 3.317 268 79  | 0.373 533 32  | 0.890 483 36  |
| F     | 3.225 671 61  | -0.271 594 75 | -1.154 444 30 |
| F     | 2.717 376 23  | -1.633 585 69 | 0.424 282 54  |
| Se    | -2.534 976 90 | 1.176 455 86  | -0.199 325 34 |
| Cl    | 0.978 719 14  | 0.144 646 94  | -0.058 511 56 |

Table S27: Geometry optimization with QZ4P basis of CF<sub>3</sub>Cl selenophene  
per-pendicular

| Atoms | x             | y             | z             |
|-------|---------------|---------------|---------------|
| C     | -1.891 663 72 | 0.470 176 64  | 1.484 584 48  |
| H     | -2.669 579 84 | 0.115 433 88  | -2.029 175 31 |
| H     | -1.793 566 10 | 2.426 055 84  | -1.232 925 20 |
| H     | -1.284 858 69 | 2.515 634 83  | 1.311 053 21  |
| H     | -1.756 774 96 | 0.274 256 61  | 2.535 850 79  |
| C     | 3.065 606 05  | -0.054 067 14 | -0.190 641 59 |
| F     | 3.877 958 27  | 0.187 493 71  | 0.825 059 87  |
| F     | 3.248 954 67  | -1.302 824 61 | -0.585 548 70 |
| F     | 3.391 419 45  | 0.752 474 04  | -1.187 482 89 |
| Se    | -2.523 017 81 | -0.847 868 08 | 0.351 677 51  |
| Cl    | 1.402 743 49  | 0.201 433 49  | 0.281 795 82  |

Table S28: Geometry optimization with QZ4P basis of CF<sub>3</sub>Cl thiophene parallel

| Atoms | x             | y             | z             |
|-------|---------------|---------------|---------------|
| C     | 3.126 240 19  | −0.950 928 16 | 0.779 497 13  |
| H     | 2.925 971 00  | 1.470 506 97  | −1.749 160 97 |
| H     | 4.252 772 05  | 2.163 136 95  | 0.408 142 63  |
| H     | 4.285 556 34  | 0.214 720 40  | 2.172 616 53  |
| H     | 2.981 606 24  | −1.887 572 52 | 1.292 355 70  |
| C     | −3.076 759 64 | 0.080 691 99  | 0.087 286 94  |
| F     | −3.427 072 80 | −0.161 246 11 | 1.338 514 78  |
| F     | −3.727 260 12 | −0.756 786 82 | −0.701 873 52 |
| F     | −3.436 697 29 | 1.314 739 28  | −0.220 224 89 |
| S     | 2.479 284 41  | −0.715 713 07 | −0.779 223 06 |
| Cl    | −1.348 816 00 | −0.116 172 35 | −0.110 198 73 |

Table S29: Geometry optimization with QZ4P basis of CF<sub>3</sub>Cl thiophene perpen-dicular

| Atoms | x             | y             | z             |
|-------|---------------|---------------|---------------|
| C     | 2.508 173 55  | −0.378 195 91 | −1.206 144 36 |
| S     | 2.792 326 07  | −1.126 069 72 | 0.297 109 75  |
| H     | 2.926 482 48  | 0.401 229 82  | 2.185 242 02  |
| H     | 2.513 887 66  | 2.436 194 56  | 0.578 928 93  |
| H     | 2.229 261 97  | 1.640 437 39  | −1.910 974 19 |
| H     | 2.432 823 04  | −0.970 513 06 | −2.103 208 50 |
| C     | −2.482 122 29 | 0.023 823 75  | 0.222 487 26  |
| F     | −2.899 636 63 | 1.017 839 88  | 0.989 129 72  |
| F     | −3.256 404 62 | −0.031 619 87 | −0.848 677 47 |
| F     | −2.615 297 80 | −1.107 382 84 | 0.894 402 13  |
| Cl    | −0.814 442 43 | 0.267 377 79  | −0.239 534 62 |

Table S30: Geometry optimization with QZ4P basis of CF3I furan perpendicular

| Atoms | x             | y             | z             |
|-------|---------------|---------------|---------------|
| C     | 3.917 830 85  | −0.004 781 26 | 1.050 888 83  |
| O     | 3.588 210 95  | 1.108 733 83  | 0.359 533 55  |
| H     | 2.660 960 10  | 1.483 324 12  | −1.444 307 64 |
| H     | 2.488 106 40  | −1.242 280 34 | −1.610 893 44 |
| H     | 3.656 729 29  | −2.132 306 29 | 0.700 138 04  |
| H     | 4.417 288 63  | 0.155 277 96  | 1.989 739 08  |
| C     | −2.481 480 79 | 0.007 271 84  | 0.142 975 89  |
| F     | −2.885 337 69 | −1.075 913 33 | 0.791 240 71  |
| F     | −3.127 100 33 | 0.061 597 78  | −1.013 421 15 |
| F     | −2.823 814 98 | 1.069 178 39  | 0.858 056 03  |
| I     | −0.357 115 72 | −0.043 531 54 | −0.173 697 92 |

Table S31: Geometry optimization with QZ4P basis of CF3I furan parallel

| Atoms | x             | y             | z             |
|-------|---------------|---------------|---------------|
| C     | −3.369 168 17 | 1.087 873 13  | 0.010 059 17  |
| O     | −2.567 516 66 | −0.003 180 22 | −0.005 975 51 |
| H     | −2.878 892 02 | −2.044 670 65 | −0.030 635 09 |
| H     | −5.526 249 96 | −1.365 053 48 | −0.011 436 15 |
| H     | −5.519 522 32 | 1.372 838 30  | 0.024 213 71  |
| H     | −2.868 847 25 | 2.039 789 61  | 0.019 383 82  |
| C     | 2.644 383 55  | 0.002 297 77  | 0.001 435 79  |
| F     | 3.108 671 80  | 1.242 692 61  | −0.053 761 29 |
| F     | 3.118 119 30  | −0.663 081 14 | −1.042 500 32 |
| F     | 3.115 107 61  | −0.566 672 90 | 1.102 143 88  |
| I     | 0.502 288 78  | −0.005 174 28 | −0.001 633 49 |



Table S32: Geometry optimization with QZ4P basis of CF3I selenophene parallel

| Atoms | x             | y             | z             |
|-------|---------------|---------------|---------------|
| C     | 2.968 306 12  | 0.130 839 83  | 1.223 348 17  |
| H     | 2.933 456 76  | 0.250 025 16  | −2.394 712 32 |
| H     | 3.401 710 12  | 2.472 692 20  | −1.131 663 91 |
| H     | 3.387 062 09  | 2.215 450 53  | 1.449 123 17  |
| H     | 2.908 527 12  | −0.212 714 03 | 2.243 042 83  |
| C     | −2.786 409 99 | 0.349 416 37  | 0.000 805 34  |
| F     | −2.965 020 48 | 1.404 835 89  | 0.783 999 04  |
| F     | −3.528 758 32 | −0.643 679 98 | 0.471 641 41  |
| F     | −3.228 994 57 | 0.656 027 39  | −1.211 402 20 |
| Se    | 2.711 768 25  | −1.047 329 54 | −0.183 375 76 |
| I     | −0.713 759 63 | −0.210 491 60 | −0.063 506 01 |

Table S33: Geometry optimization with QZ4P basis of CF3I selenophene per-pendicular

| Atoms | x             | y             | z             |
|-------|---------------|---------------|---------------|
| C     | 2.273 088 45  | 0.352 495 53  | −1.309 510 06 |
| H     | 3.377 100 86  | 0.240 213 16  | 2.130 108 68  |
| H     | 2.510 366 54  | 2.518 785 75  | 1.237 151 43  |
| H     | 1.769 062 69  | 2.435 824 63  | −1.248 451 77 |
| H     | 2.036 632 84  | 0.087 648 01  | −2.327 418 84 |
| C     | −2.984 112 04 | −0.169 446 74 | 0.253 563 27  |
| F     | −3.831 759 04 | 0.659 895 63  | −0.339 965 15 |
| F     | −3.290 149 16 | −1.405 600 49 | −0.116 294 84 |
| F     | −3.164 028 84 | −0.074 757 32 | 1.563 926 51  |
| Se    | 2.965 604 19  | −0.898 721 26 | −0.138 842 63 |
| I     | −0.958 554 22 | 0.302 287 05  | −0.272 567 28 |

Table S34: Geometry optimization with QZ4P basis of CF3I thiophene parallel

| Atoms | x             | y             | z             |
|-------|---------------|---------------|---------------|
| C     | 3.370 771 61  | −0.032 348 76 | 1.276 424 18  |
| H     | 3.110 165 13  | −0.572 502 00 | −2.180 883 32 |
| H     | 3.755 576 86  | 1.860 206 73  | −1.439 391 19 |
| H     | 3.896 955 54  | 2.053 260 65  | 1.178 913 15  |
| H     | 3.351 821 28  | −0.239 109 10 | 2.333 764 58  |
| C     | −2.388 770 02 | 0.360 226 81  | −0.009 904 68 |
| F     | −3.063 877 35 | −0.122 305 61 | 1.023 763 95  |
| F     | −2.986 057 51 | −0.049 236 60 | −1.120 210 08 |
| F     | −2.457 587 54 | 1.683 460 08  | 0.032 807 31  |
| S     | 3.019 525 01  | −1.266 719 50 | 0.151 666 64  |
| I     | −0.347 944 90 | −0.297 554 64 | 0.040 039 01  |

Table S35: Geometry optimization with QZ4P basis of CF3I thiophene parallel

| Atoms | x             | y             | z             |
|-------|---------------|---------------|---------------|
| C     | 3.370 771 61  | −0.032 348 76 | 1.276 424 18  |
| H     | 3.110 165 13  | −0.572 502 00 | −2.180 883 32 |
| H     | 3.755 576 86  | 1.860 206 73  | −1.439 391 19 |
| H     | 3.896 955 54  | 2.053 260 65  | 1.178 913 15  |
| H     | 3.351 821 28  | −0.239 109 10 | 2.333 764 58  |
| C     | −2.388 770 02 | 0.360 226 81  | −0.009 904 68 |
| F     | −3.063 877 35 | −0.122 305 61 | 1.023 763 95  |
| F     | −2.986 057 51 | −0.049 236 60 | −1.120 210 08 |
| F     | −2.457 587 54 | 1.683 460 08  | 0.032 807 31  |
| S     | 3.019 525 01  | −1.266 719 50 | 0.151 666 64  |
| I     | −0.347 944 90 | −0.297 554 64 | 0.040 039 01  |

Table S36: Geometry optimization with QZ4P basis of CF3I thiophene  
perpen-dicular

| Atoms | x             | y             | z             |
|-------|---------------|---------------|---------------|
| C     | 1.860 471 71  | 0.545 274 15  | −1.896 921 80 |
| S     | 3.279 289 51  | −0.285 918 79 | −1.451 719 42 |
| H     | 4.612 636 32  | 0.821 854 15  | 0.255 272 61  |
| H     | 2.882 255 46  | 2.789 970 44  | 0.346 916 64  |
| H     | 0.905 098 88  | 2.399 338 81  | −1.345 191 00 |
| H     | 1.207 139 57  | 0.145 660 45  | −2.655 244 40 |
| C     | −1.645 485 32 | −1.366 402 41 | 1.891 922 36  |
| F     | −2.171 835 72 | −0.476 737 34 | 2.722 835 42  |
| F     | −2.635 766 13 | −1.944 906 66 | 1.226 185 61  |
| F     | −1.035 826 40 | −2.295 696 86 | 2.614 900 11  |
| I     | −0.269 450 23 | −0.423 610 50 | 0.542 580 33  |

## 1.2 Interaction energies with different basis sets.

Table S37: Interaction energies for the parallel oriented complex calculated with the PBE0 functional, and with DZP, TZ2P, QZ4P basis sets.

|                       |    | Furan |       |       | Thiophene |       |       | Selenophene |       |       |
|-----------------------|----|-------|-------|-------|-----------|-------|-------|-------------|-------|-------|
|                       |    | DZP   | TZ2P  | QZ4P  | DZP       | TZ2P  | QZ4P  | DZP         | TZ2P  | QZ4P  |
| <b>sp<sup>2</sup></b> | Cl | -14.6 | -8.5  | -7.2  | -16.2     | -8.3  | -8.9  | -16.2       | -8.7  | -8.7  |
|                       | Br | -18.4 | -11.4 | -10.1 | -19.9     | -11.9 | -9.9  | -20         | -13.2 | -11.5 |
|                       | I  | -23.6 | -15.2 | -13.6 | -24.5     | -15.1 | -14.4 | -25.1       | -16.4 | -15.1 |
| <b>sp<sup>3</sup></b> | Cl | -14.2 | -8.7  | -7.7  | -15.7     | -7.7  | -9    | -15.7       | -8.5  | -8.8  |
|                       | Br | -17.7 | -11.9 | -10.9 | -19.1     | -11.9 | -10.9 | -19.1       | -13   | -10.9 |
|                       | I  | -23.1 | -14.2 | -13.4 | -24.4     | -14.8 | -14.2 | -24.6       | -16.5 | -14.7 |

Table S38: Interaction energies for the perpendicular oriented complex calculated with the PBE0 functional, and with DZP,TZ2P, QZ4P basis sets.

|                       |    | Furan |       |       | Thiophene |       |       | Selenophene |       |       |
|-----------------------|----|-------|-------|-------|-----------|-------|-------|-------------|-------|-------|
|                       |    | DZP   | TZ2P  | QZ4P  | DZP       | TZ2P  | QZ4P  | DZP         | TZ2P  | QZ4P  |
| <b>sp<sup>2</sup></b> | Cl | -14.6 | -8.5  | -7.2  | -16.2     | -8.3  | -8.9  | -16.2       | -8.7  | -8.7  |
|                       | Br | -18.4 | -11.4 | -10.1 | -19.9     | -11.9 | -9.9  | -20         | -13.2 | -11.5 |
|                       | I  | -23.6 | -15.2 | -13.6 | -24.5     | -15.1 | -14.4 | -25.1       | -16.4 | -15.1 |
| <b>sp<sup>3</sup></b> | Cl | -14.2 | -8.7  | -7.7  | -15.7     | -7.7  | -9    | -15.7       | -8.5  | -8.8  |
|                       | Br | -17.7 | -11.9 | -10.9 | -19.1     | -11.9 | -10.9 | -19.1       | -13   | -10.9 |
|                       | I  | -23.1 | -14.2 | -13.4 | -24.4     | -14.8 | -14.2 | -24.6       | -16.5 | -14.7 |

Table S39: Interaction energies (kJ/mol) for the parallel oriented complexes calculated CCSD(T) DLPNO.

|                 |    | Furan | Thiophene | Selenophene |
|-----------------|----|-------|-----------|-------------|
| sp <sup>2</sup> | Cl | -7.2  | -9.1      | -0.5        |
|                 | Br | -9.4  | -8.5      | -10.8       |
|                 | I  | -13.9 | -16.2     | -17.2       |
| sp <sup>3</sup> | Cl | -7.0  | -5.1      | -9.6        |
|                 | Br | -9.1  | -8.0      | -8.7        |
|                 | I  | -13.3 | -15.7     | -16.2       |

Table S40: Interaction energies (kJ/mol) for the perpendicular oriented complexes calculated CCSD(T) DLPNO.

|                                |    | Furan | Thiophene | Selenophene |
|--------------------------------|----|-------|-----------|-------------|
| Unsaturated (sp <sup>2</sup> ) | Cl | -7.7  | -10.1     | -10.0       |
|                                | Br | -10.4 | -10.8     | -12.3       |
|                                | I  | -15.0 | -17.7     | -17.8       |
| Saturated (sp <sup>3</sup> )   | Cl | -7.8  | -10.0     | -9.7        |
|                                | Br | -11.0 | -11.8     | -11.3       |
|                                | I  | -14.5 | -16.6     | -17.5       |

Table S41: Harmonic frequencies of the  $\text{C}_2\text{F}_3\text{X} \cdots \text{furan} (\parallel)$  complexes.

| $\text{C}_2\text{F}_3\text{Cl} \cdots \text{furan} (\parallel)$ |        |        |        |        |
|-----------------------------------------------------------------|--------|--------|--------|--------|
| 5.7                                                             | 7.5    | 14.3   | 26.0   | 39.9   |
| 48.0                                                            | 174.5  | 192.9  | 344.9  | 386.2  |
| 470.7                                                           | 525.5  | 592.1  | 617.3  | 628.8  |
| 713.8                                                           | 749.2  | 767.7  | 873.5  | 891.2  |
| 892.2                                                           | 904.4  | 1023.3 | 1070.6 | 1087.8 |
| 1106.7                                                          | 1176.1 | 1228.6 | 1239.0 | 1288.5 |
| 1358.9                                                          | 1428.4 | 1531.9 | 1612.9 | 1865.2 |
| 3265.4                                                          | 3275.8 | 3295.6 | 3302.8 |        |
| $\text{C}_2\text{F}_3\text{Br} \cdots \text{furan} (\parallel)$ |        |        |        |        |
| 2.3                                                             | 6.9    | 18.3   | 26.0   | 45.0   |
| 51.8                                                            | 161.2  | 166.6  | 316.7  | 372.7  |
| 373.2                                                           | 518.6  | 590.4  | 617.1  | 627.2  |
| 683.8                                                           | 749.0  | 768.0  | 874.3  | 891.8  |
| 892.3                                                           | 905.5  | 1023.8 | 1053.5 | 1070.2 |
| 1104.7                                                          | 1176.1 | 1227.4 | 1228.6 | 1288.7 |
| 1353.8                                                          | 1428.7 | 1532.8 | 1614.4 | 1853.7 |
| 3266.1                                                          | 3276.6 | 3296.5 | 3304.2 |        |
| $\text{C}_2\text{F}_3\text{I} \cdots \text{furan} (\parallel)$  |        |        |        |        |
| 10.9                                                            | 12.8   | 20.9   | 37.0   | 51.3   |
| 53.5                                                            | 148.7  | 152.3  | 292.6  | 325.9  |
| 362.8                                                           | 515.5  | 593.9  | 616.3  | 625.5  |
| 669.4                                                           | 748.1  | 768.0  | 875.2  | 891.3  |
| 892.7                                                           | 906.9  | 1023.0 | 1034.7 | 1069.9 |
| 1101.8                                                          | 1176.5 | 1209.1 | 1225.7 | 1289.0 |
| 1346.7                                                          | 1428.7 | 1533.7 | 1616.4 | 1831.6 |
| 3266.8                                                          | 3277.5 | 3297.2 | 3304.6 |        |

Table S42: Harmonic frequencies of the  $\text{CF}_3\text{X} \cdots \text{furan}$  ( $\parallel$ ) complexes.

| $\text{CF}_3\text{Cl} \cdots \text{furan}$ ( $\parallel$ ) |        |        |        |        |
|------------------------------------------------------------|--------|--------|--------|--------|
| 7.7                                                        | 9.3    | 17.1   | 33.6   | 44.7   |
| 50.3                                                       | 349.9  | 350.9  | 480.8  | 564.2  |
| 564.8                                                      | 618.7  | 629.4  | 749.8  | 768.6  |
| 795.5                                                      | 873.8  | 891.5  | 892.6  | 904.5  |
| 1023.8                                                     | 1070.2 | 1102.5 | 1118.7 | 1176.3 |
| 1221.0                                                     | 1221.8 | 1227.8 | 1288.6 | 1429.5 |
| 1532.8                                                     | 1614.0 | 3266.4 | 3277.1 | 3296.7 |
| 3303.8                                                     |        |        |        |        |
| $\text{CF}_3\text{Br} \cdots \text{furan}$ ( $\parallel$ ) |        |        |        |        |
| 5.1                                                        | 11.8   | 27.8   | 40.5   | 46.2   |
| 49.3                                                       | 304.8  | 305.1  | 354.6  | 551.5  |
| 551.7                                                      | 618.4  | 628.1  | 748.8  | 768.5  |
| 771.0                                                      | 874.8  | 891.8  | 892.1  | 906.0  |
| 1023.7                                                     | 1070.1 | 1096.0 | 1108.7 | 1176.6 |
| 1217.4                                                     | 1218.4 | 1227.2 | 1288.8 | 1429.5 |
| 1533.4                                                     | 1615.0 | 3266.2 | 3276.8 | 3297.0 |
| 3304.0                                                     |        |        |        |        |
| $\text{CF}_3\text{I} \cdots \text{furan}$ ( $\parallel$ )  |        |        |        |        |
| 3.4                                                        | 16.1   | 16.9   | 34.7   | 50.7   |
| 59.9                                                       | 269.8  | 270.3  | 290.4  | 540.5  |
| 541.0                                                      | 615.6  | 625.6  | 749.2  | 754.9  |
| 768.2                                                      | 874.5  | 890.9  | 893.1  | 906.3  |
| 1022.5                                                     | 1070.7 | 1086.3 | 1104.7 | 1176.9 |
| 1194.1                                                     | 1195.7 | 1226.4 | 1288.6 | 1428.9 |
| 1533.7                                                     | 1615.7 | 3267.8 | 3280.0 | 3297.2 |
| 3305.1                                                     |        |        |        |        |

Table S43: Harmonic frequencies of the  $\text{C}_2\text{F}_3\text{X} \cdots \text{furan} (\perp)$  complexes.

| $\text{C}_2\text{F}_3\text{Cl} \cdots \text{furan} (\perp)$ |        |        |        |        |
|-------------------------------------------------------------|--------|--------|--------|--------|
| 1.9                                                         | 3.8    | 10.4   | 21.9   | 28.2   |
| 51.4                                                        | 174.1  | 188.7  | 343.3  | 387.1  |
| 470.1                                                       | 524.9  | 593.7  | 620.8  | 631.7  |
| 714.1                                                       | 753.0  | 771.2  | 873.9  | 888.9  |
| 893.2                                                       | 904.5  | 1024.5 | 1070.7 | 1087.6 |
| 1109.5                                                      | 1175.9 | 1229.2 | 1238.1 | 1288.1 |
| 1359.8                                                      | 1430.1 | 1531.1 | 1610.4 | 1864.5 |
| 3266.0                                                      | 3276.6 | 3296.6 | 3303.7 |        |
| $\text{C}_2\text{F}_3\text{Br} \cdots \text{furan} (\perp)$ |        |        |        |        |
| 10.3                                                        | 14.4   | 27.4   | 30.3   | 42.0   |
| 60.1                                                        | 162.1  | 164.9  | 315.5  | 370.7  |
| 375.3                                                       | 517.9  | 593.5  | 620.8  | 631.9  |
| 682.9                                                       | 756.0  | 774.2  | 874.7  | 888.6  |
| 893.5                                                       | 905.7  | 1024.4 | 1052.6 | 1070.8 |
| 1109.8                                                      | 1175.5 | 1228.0 | 1229.5 | 1288.6 |
| 1353.5                                                      | 1428.9 | 1529.7 | 1608.4 | 1853.1 |
| 3266.9                                                      | 3277.3 | 3297.1 | 3304.0 |        |
| $\text{C}_2\text{F}_3\text{I} \cdots \text{furan} (\perp)$  |        |        |        |        |
| 7.7                                                         | 17.0   | 24.1   | 38.5   | 47.5   |
| 86.0                                                        | 146.7  | 151.1  | 290.5  | 323.2  |
| 363.6                                                       | 514.6  | 593.1  | 622.4  | 632.4  |
| 667.8                                                       | 760.5  | 777.8  | 875.0  | 888.9  |
| 892.9                                                       | 908.7  | 1023.3 | 1033.0 | 1070.9 |
| 1109.9                                                      | 1175.0 | 1207.9 | 1228.9 | 1288.6 |
| 1345.3                                                      | 1428.2 | 1528.2 | 1605.8 | 1829.5 |
| 3264.5                                                      | 3275.7 | 3295.2 | 3301.3 |        |



Table S44: Harmonic frequencies of the CF<sub>3</sub>X ··· furan ( $\perp$ ) complexes.

| CF <sub>3</sub> Cl ··· furan ( $\perp$ ) |        |        |        |        |
|------------------------------------------|--------|--------|--------|--------|
| 2.7                                      | 13.0   | 25.7   | 35.0   | 39.8   |
| 59.5                                     | 349.2  | 349.6  | 477.2  | 564.2  |
| 564.5                                    | 622.0  | 631.3  | 755.2  | 774.0  |
| 794.0                                    | 874.8  | 888.8  | 893.0  | 907.2  |
| 1025.3                                   | 1070.9 | 1109.8 | 1112.8 | 1175.7 |
| 1221.1                                   | 1223.4 | 1230.6 | 1288.7 | 1429.1 |
| 1531.9                                   | 1609.3 | 3266.1 | 3277.1 | 3295.8 |
| 3303.6                                   |        |        |        |        |
| CF <sub>3</sub> Br ··· furan ( $\perp$ ) |        |        |        |        |
| 8.6                                      | 22.1   | 34.4   | 43.6   | 45.0   |
| 69.3                                     | 303.4  | 303.9  | 349.7  | 550.9  |
| 551.3                                    | 620.4  | 631.8  | 757.0  | 769.1  |
| 773.7                                    | 876.9  | 888.9  | 893.2  | 906.2  |
| 1024.9                                   | 1070.4 | 1096.9 | 1110.5 | 1175.8 |
| 1215.3                                   | 1217.0 | 1229.9 | 1288.5 | 1429.3 |
| 1530.4                                   | 1607.4 | 3266.9 | 3277.6 | 3296.3 |
| 3307.7                                   |        |        |        |        |
| CF <sub>3</sub> I ··· furan ( $\perp$ )  |        |        |        |        |
| 6.1                                      | 21.8   | 29.0   | 43.4   | 47.2   |
| 86.4                                     | 266.9  | 268.4  | 284.8  | 539.9  |
| 540.4                                    | 621.8  | 631.8  | 753.7  | 760.6  |
| 779.5                                    | 876.9  | 888.2  | 892.9  | 908.9  |
| 1025.1                                   | 1070.6 | 1088.8 | 1111.8 | 1175.1 |
| 1195.4                                   | 1197.6 | 1230.4 | 1288.7 | 1428.2 |
| 1528.0                                   | 1605.0 | 3266.7 | 3276.5 | 3296.8 |
| 3304.7                                   |        |        |        |        |

Table S45: Harmonic frequencies of the C<sub>2</sub>F<sub>3</sub>X...thiophene (||) complexes.

| C <sub>2</sub> F <sub>3</sub> Cl...thiophene (  ) |        |        |        |        |
|---------------------------------------------------|--------|--------|--------|--------|
| 11.6                                              | 16.0   | 21.1   | 28.0   | 33.2   |
| 50.4                                              | 174.8  | 191.0  | 344.1  | 386.7  |
| 470.2                                             | 470.4  | 524.8  | 586.7  | 592.5  |
| 625.7                                             | 705.7  | 714.2  | 737.8  | 776.4  |
| 872.7                                             | 893.5  | 899.2  | 939.9  | 1069.9 |
| 1088.1                                            | 1097.9 | 1101.4 | 1237.8 | 1280.1 |
| 1358.7                                            | 1403.7 | 1459.9 | 1561.3 | 1865.3 |
| 3221.3                                            | 3234.6 | 3263.9 | 3267.3 |        |
| C <sub>2</sub> F <sub>3</sub> Br...thiophene (  ) |        |        |        |        |
| 13.5                                              | 15.4   | 18.4   | 24.7   | 32.5   |
| 48.2                                              | 161.4  | 165.2  | 315.5  | 371.4  |
| 373.5                                             | 469.0  | 518.0  | 584.0  | 592.1  |
| 621.6                                             | 683.7  | 704.3  | 736.2  | 773.8  |
| 867.1                                             | 890.7  | 901.7  | 941.8  | 1053.1 |
| 1068.7                                            | 1098.5 | 1102.3 | 1228.7 | 1279.0 |
| 1355.4                                            | 1404.1 | 1461.7 | 1566.2 | 1853.4 |
| 3221.9                                            | 3235.3 | 3266.4 | 3269.7 |        |
| C <sub>2</sub> F <sub>3</sub> I...thiophene (  )  |        |        |        |        |
| 15.8                                              | 16.1   | 19.6   | 24.4   | 40.0   |
| 62.0                                              | 146.0  | 149.8  | 291.6  | 324.4  |
| 360.2                                             | 468.8  | 514.8  | 582.8  | 592.5  |
| 623.6                                             | 668.5  | 705.3  | 737.6  | 772.3  |
| 865.2                                             | 891.7  | 904.5  | 944.0  | 1032.4 |
| 1068.3                                            | 1099.1 | 1103.0 | 1207.8 | 1280.1 |
| 1346.0                                            | 1403.8 | 1463.0 | 1568.7 | 1829.7 |
| 3224.6                                            | 3238.0 | 3267.1 | 3270.2 |        |

Table S46: Harmonic frequencies of the  $\text{CF}_3\text{X} \cdots \text{thiophene} (\parallel)$  complexes.

| $\text{CF}_3\text{Cl} \cdots \text{thiophene} (\parallel)$ |        |        |        |        |
|------------------------------------------------------------|--------|--------|--------|--------|
| 6.4                                                        | 10.9   | 22.7   | 26.8   | 30.8   |
| 32.0                                                       | 349.0  | 349.1  | 468.2  | 478.3  |
| 563.9                                                      | 564.1  | 584.0  | 622.9  | 703.3  |
| 735.4                                                      | 774.5  | 794.7  | 868.0  | 891.6  |
| 900.0                                                      | 940.3  | 1068.1 | 1097.4 | 1101.5 |
| 1110.9                                                     | 1222.8 | 1224.6 | 1278.4 | 1403.0 |
| 1459.7                                                     | 1563.6 | 3221.7 | 3235.3 | 3265.5 |
| 3268.6                                                     |        |        |        |        |
| $\text{CF}_3\text{Br} \cdots \text{thiophene} (\parallel)$ |        |        |        |        |
| 14.3                                                       | 17.0   | 28.4   | 36.8   | 39.0   |
| 56.8                                                       | 302.9  | 303.7  | 351.2  | 471.9  |
| 551.0                                                      | 551.3  | 583.8  | 623.5  | 704.2  |
| 735.4                                                      | 770.0  | 773.9  | 867.5  | 892.4  |
| 902.4                                                      | 942.0  | 1067.6 | 1095.3 | 1099.0 |
| 1102.4                                                     | 1218.8 | 1219.4 | 1279.3 | 1404.0 |
| 1461.4                                                     | 1566.7 | 3221.4 | 3235.0 | 3265.0 |
| 3267.8                                                     |        |        |        |        |
| $\text{CF}_3\text{I} \cdots \text{thiophene} (\parallel)$  |        |        |        |        |
| 11.5                                                       | 12.7   | 23.6   | 31.3   | 38.1   |
| 52.5                                                       | 267.6  | 268.1  | 287.6  | 466.6  |
| 539.7                                                      | 540.3  | 582.6  | 622.8  | 705.5  |
| 737.5                                                      | 754.0  | 771.6  | 864.4  | 890.9  |
| 904.8                                                      | 944.1  | 1068.0 | 1087.0 | 1099.5 |
| 1103.4                                                     | 1195.1 | 1195.4 | 1279.7 | 1403.7 |
| 1463.1                                                     | 1568.8 | 3224.0 | 3237.2 | 3267.5 |
| 3270.3                                                     |        |        |        |        |

Table S47: Harmonic frequencies of the  $\text{C}_2\text{F}_3\text{X} \cdots \text{thiophene} (\perp)$  complexes.

| $\text{C}_2\text{F}_3\text{Cl} \cdots \text{thiophene} (\perp)$ |        |        |        |        |
|-----------------------------------------------------------------|--------|--------|--------|--------|
| 10.9                                                            | 14.8   | 16.1   | 35.6   | 43.1   |
| 51.8                                                            | 174.1  | 189.7  | 343.7  | 386.5  |
| 470.7                                                           | 471.2  | 525.0  | 585.3  | 591.8  |
| 625.6                                                           | 705.6  | 714.7  | 737.7  | 775.9  |
| 870.2                                                           | 892.8  | 899.5  | 939.5  | 1069.1 |
| 1088.4                                                          | 1098.0 | 1102.0 | 1236.5 | 1280.2 |
| 1359.4                                                          | 1404.1 | 1459.9 | 1562.7 | 1864.7 |
| 3221.8                                                          | 3235.4 | 3265.0 | 3267.9 |        |
| $\text{C}_2\text{F}_3\text{Br} \cdots \text{thiophene} (\perp)$ |        |        |        |        |
| 4.9                                                             | 18.0   | 22.1   | 29.2   | 33.2   |
| 49.7                                                            | 161.0  | 165.0  | 315.8  | 372.2  |
| 373.1                                                           | 470.8  | 517.9  | 585.8  | 589.9  |
| 625.2                                                           | 683.7  | 706.3  | 738.3  | 776.2  |
| 870.2                                                           | 893.3  | 899.7  | 940.4  | 1053.0 |
| 1070.4                                                          | 1098.1 | 1101.6 | 1227.7 | 1280.0 |
| 1354.3                                                          | 1403.9 | 1459.9 | 1562.2 | 1853.2 |
| 3222.7                                                          | 3236.2 | 3265.1 | 3267.9 |        |
| $\text{C}_2\text{F}_3\text{I} \cdots \text{thiophene} (\perp)$  |        |        |        |        |
| 21.7                                                            | 22.3   | 26.3   | 37.7   | 47.0   |
| 74.5                                                            | 147.8  | 150.5  | 291.3  | 324.3  |
| 362.5                                                           | 470.0  | 515.3  | 586.2  | 592.2  |
| 626.1                                                           | 668.5  | 711.9  | 742.3  | 776.0  |
| 872.4                                                           | 892.4  | 902.0  | 940.7  | 1032.9 |
| 1059.9                                                          | 1097.0 | 1101.8 | 1206.9 | 1280.0 |
| 1345.2                                                          | 1401.4 | 1455.4 | 1557.7 | 1829.3 |
| 3222.8                                                          | 3232.8 | 3261.0 | 3265.7 |        |

Table S48: Harmonic frequencies of the CF<sub>3</sub>X···thiophene ( $\perp$ ) complexes.

| CF <sub>3</sub> Cl···thiophene ( $\perp$ ) |        |        |        |        |
|--------------------------------------------|--------|--------|--------|--------|
| 15.9                                       | 16.6   | 24.2   | 39.2   | 45.1   |
| 51.4                                       | 348.9  | 349.5  | 471.0  | 479.9  |
| 564.1                                      | 564.5  | 587.1  | 625.8  | 705.9  |
| 738.0                                      | 776.2  | 794.3  | 871.1  | 893.4  |
| 899.4                                      | 939.9  | 1070.3 | 1097.6 | 1101.2 |
| 1113.0                                     | 1219.5 | 1220.8 | 1280.4 | 1403.9 |
| 1460.5                                     | 1562.1 | 3221.9 | 3235.6 | 3265.4 |
| 3268.3                                     |        |        |        |        |
| CF <sub>3</sub> Br···thiophene ( $\perp$ ) |        |        |        |        |
| 3.3                                        | 20.2   | 24.0   | 34.3   | 37.2   |
| 61.4                                       | 303.0  | 304.2  | 351.9  | 471.2  |
| 550.9                                      | 551.1  | 586.5  | 625.4  | 708.0  |
| 741.0                                      | 770.6  | 776.2  | 870.5  | 893.5  |
| 900.9                                      | 941.3  | 1070.2 | 1096.5 | 1099.2 |
| 1100.9                                     | 1214.9 | 1215.6 | 1280.5 | 1402.8 |
| 1459.2                                     | 1558.5 | 3221.7 | 3235.1 | 3264.2 |
| 3267.4                                     |        |        |        |        |
| CF <sub>3</sub> I···thiophene ( $\perp$ )  |        |        |        |        |
| 12.1                                       | 22.2   | 30.5   | 42.8   | 43.8   |
| 76.9                                       | 267.9  | 268.5  | 286.8  | 470.4  |
| 539.8                                      | 540.1  | 585.0  | 623.0  | 711.7  |
| 742.7                                      | 755.2  | 775.2  | 866.6  | 890.2  |
| 902.3                                      | 941.9  | 1068.9 | 1088.3 | 1097.3 |
| 1101.8                                     | 1193.8 | 1194.6 | 1279.8 | 1402.7 |
| 1456.4                                     | 1556.9 | 3222.6 | 3234.7 | 3264.9 |
| 3266.0                                     |        |        |        |        |

Table S49: Harmonic frequencies of the  $\text{C}_2\text{F}_3\text{X} \cdots \text{selenophene} (\parallel)$  complexes.

| $\text{C}_2\text{F}_3\text{Cl} \cdots \text{selenophene} (\parallel)$ |        |        |        |        |
|-----------------------------------------------------------------------|--------|--------|--------|--------|
| 4.4                                                                   | 12.8   | 14.0   | 22.6   | 26.4   |
| 34.9                                                                  | 174.6  | 188.3  | 343.1  | 387.3  |
| 409.5                                                                 | 470.1  | 471.7  | 524.7  | 561.3  |
| 594.3                                                                 | 653.5  | 699.1  | 715.5  | 717.5  |
| 789.2                                                                 | 837.6  | 904.0  | 941.9  | 1047.8 |
| 1089.7                                                                | 1095.8 | 1100.7 | 1240.3 | 1267.7 |
| 1362.9                                                                | 1382.1 | 1480.8 | 1576.4 | 1865.9 |
| 3205.2                                                                | 3220.4 | 3261.7 | 3264.3 |        |
| $\text{C}_2\text{F}_3\text{Br} \cdots \text{selenophene} (\parallel)$ |        |        |        |        |
| 15.5                                                                  | 17.3   | 24.5   | 30.3   | 38.4   |
| 41.1                                                                  | 162.4  | 164.6  | 316.1  | 371.0  |
| 375.2                                                                 | 406.8  | 470.6  | 517.6  | 559.3  |
| 592.0                                                                 | 651.3  | 683.0  | 700.8  | 719.1  |
| 785.9                                                                 | 839.3  | 907.6  | 944.5  | 1046.6 |
| 1052.7                                                                | 1096.1 | 1101.3 | 1225.7 | 1269.2 |
| 1353.1                                                                | 1381.5 | 1484.3 | 1581.1 | 1853.5 |
| 3206.9                                                                | 3220.9 | 3262.9 | 3265.2 |        |
| $\text{C}_2\text{F}_3\text{I} \cdots \text{selenophene} (\parallel)$  |        |        |        |        |
| 14.6                                                                  | 21.6   | 27.4   | 34.8   | 36.8   |
| 44.8                                                                  | 146.4  | 150.9  | 290.8  | 322.8  |
| 362.6                                                                 | 406.7  | 469.3  | 514.7  | 559.5  |
| 592.2                                                                 | 649.5  | 667.9  | 701.9  | 720.2  |
| 784.5                                                                 | 839.5  | 910.6  | 946.9  | 1031.9 |
| 1046.5                                                                | 1097.4 | 1102.0 | 1206.7 | 1269.8 |
| 1344.4                                                                | 1381.3 | 1487.0 | 1584.4 | 1828.8 |
| 3208.6                                                                | 3223.8 | 3264.0 | 3268.0 |        |

Table S50: Harmonic frequencies of the CF<sub>3</sub>X···selenophene (||) complexes.

| CF <sub>3</sub> Cl···selenophene (  ) |        |        |        |        |
|---------------------------------------|--------|--------|--------|--------|
| 11.2                                  | 19.1   | 22.1   | 25.7   | 31.6   |
| 42.5                                  | 349.0  | 349.3  | 408.7  | 471.7  |
| 479.9                                 | 559.4  | 564.3  | 564.3  | 653.2  |
| 699.7                                 | 718.8  | 788.0  | 794.6  | 839.7  |
| 905.8                                 | 942.7  | 1047.3 | 1096.0 | 1100.8 |
| 1113.0                                | 1219.0 | 1220.4 | 1269.8 | 1382.0 |
| 1482.8                                | 1579.4 | 3206.9 | 3221.0 | 3261.2 |
| 3264.1                                |        |        |        |        |
| CF <sub>3</sub> Br···selenophene (  ) |        |        |        |        |
| 9.4                                   | 14.1   | 17.3   | 30.1   | 36.2   |
| 42.5                                  | 302.7  | 303.7  | 348.5  | 409.0  |
| 469.2                                 | 550.8  | 551.3  | 559.4  | 650.1  |
| 699.5                                 | 717.9  | 769.4  | 786.0  | 838.1  |
| 908.0                                 | 944.4  | 1045.8 | 1094.9 | 1097.0 |
| 1101.4                                | 1216.8 | 1218.4 | 1268.7 | 1381.5 |
| 1484.4                                | 1581.3 | 3206.6 | 3220.2 | 3263.1 |
| 3265.7                                |        |        |        |        |
| CF <sub>3</sub> I···selenophene (  )  |        |        |        |        |
| 12.0                                  | 18.1   | 26.0   | 31.8   | 34.3   |
| 46.9                                  | 267.3  | 267.5  | 284.1  | 405.8  |
| 469.6                                 | 539.0  | 539.6  | 557.0  | 648.7  |
| 701.2                                 | 719.7  | 752.3  | 783.8  | 839.4  |
| 910.7                                 | 946.7  | 1044.9 | 1086.1 | 1097.2 |
| 1101.9                                | 1192.0 | 1192.8 | 1269.6 | 1380.4 |
| 1486.8                                | 1584.5 | 3208.6 | 3221.9 | 3264.3 |
| 3266.6                                |        |        |        |        |

Table S51: Harmonic frequencies of the  $\text{C}_2\text{F}_3\text{X} \cdots \text{selenophene} (\perp)$  complexes.

| $\text{C}_2\text{F}_3\text{Cl} \cdots \text{selenophene} (\perp)$ |        |        |        |        |
|-------------------------------------------------------------------|--------|--------|--------|--------|
| 11.5                                                              | 14.5   | 26.5   | 31.7   | 33.2   |
| 50.1                                                              | 175.5  | 189.6  | 344.0  | 389.2  |
| 410.5                                                             | 471.2  | 471.9  | 525.2  | 562.3  |
| 594.3                                                             | 653.9  | 701.5  | 714.9  | 720.8  |
| 789.3                                                             | 839.8  | 905.0  | 942.3  | 1048.7 |
| 1088.8                                                            | 1096.5 | 1101.6 | 1236.8 | 1269.7 |
| 1360.1                                                            | 1382.5 | 1480.3 | 1575.7 | 1865.4 |
| 3207.4                                                            | 3221.3 | 3262.4 | 3265.3 |        |
| $\text{C}_2\text{F}_3\text{Br} \cdots \text{selenophene} (\perp)$ |        |        |        |        |
| 11.5                                                              | 17.5   | 18.1   | 31.5   | 35.2   |
| 64.8                                                              | 161.7  | 161.8  | 316.4  | 370.9  |
| 372.8                                                             | 412.2  | 471.5  | 518.3  | 563.8  |
| 590.7                                                             | 653.1  | 683.0  | 704.4  | 723.7  |
| 789.1                                                             | 839.4  | 906.0  | 942.8  | 1047.8 |
| 1052.8                                                            | 1096.5 | 1100.7 | 1225.6 | 1269.7 |
| 1354.1                                                            | 1382.4 | 1480.4 | 1575.3 | 1851.4 |
| 3207.9                                                            | 3222.2 | 3261.4 | 3265.2 |        |
| $\text{C}_2\text{F}_3\text{I} \cdots \text{selenophene} (\perp)$  |        |        |        |        |
| 12.6                                                              | 22.5   | 27.2   | 38.0   | 42.9   |
| 75.7                                                              | 146.9  | 150.6  | 292.1  | 323.4  |
| 362.8                                                             | 412.9  | 472.1  | 515.0  | 564.5  |
| 593.0                                                             | 653.2  | 668.2  | 706.8  | 725.5  |
| 789.3                                                             | 839.6  | 906.9  | 943.9  | 1033.1 |
| 1047.2                                                            | 1096.7 | 1100.8 | 1205.4 | 1270.0 |
| 1345.6                                                            | 1382.1 | 1478.4 | 1572.7 | 1828.4 |
| 3208.1                                                            | 3222.7 | 3260.8 | 3265.0 |        |



Table S52: Harmonic frequencies of the  $\text{CF}_3\text{X} \cdots \text{selenophene} (\perp)$  complexes.

| $\text{CF}_3\text{Cl} \cdots \text{selenophene} (\perp)$ |        |        |        |        |
|----------------------------------------------------------|--------|--------|--------|--------|
| 13.8                                                     | 14.2   | 21.5   | 29.6   | 36.6   |
| 49.0                                                     | 348.8  | 349.7  | 410.3  | 470.7  |
| 479.9                                                    | 561.4  | 563.9  | 564.3  | 652.3  |
| 701.0                                                    | 720.2  | 788.5  | 794.8  | 838.4  |
| 905.0                                                    | 942.2  | 1046.9 | 1096.2 | 1100.8 |
| 1112.7                                                   | 1219.1 | 1220.3 | 1269.0 | 1382.0 |
| 1480.3                                                   | 1576.2 | 3206.9 | 3220.6 | 3261.7 |
| 3264.8                                                   |        |        |        |        |
| $\text{CF}_3\text{Br} \cdots \text{selenophene} (\perp)$ |        |        |        |        |
| 7.5                                                      | 13.7   | 16.9   | 28.5   | 34.1   |
| 71.5                                                     | 303.3  | 303.8  | 350.8  | 413.2  |
| 470.2                                                    | 550.9  | 551.4  | 563.4  | 652.6  |
| 704.8                                                    | 723.5  | 769.5  | 789.5  | 838.4  |
| 905.7                                                    | 942.6  | 1047.0 | 1096.2 | 1098.0 |
| 1101.4                                                   | 1215.0 | 1217.0 | 1269.0 | 1382.0 |
| 1478.8                                                   | 1574.3 | 3206.1 | 3220.8 | 3261.4 |
| 3264.8                                                   |        |        |        |        |
| $\text{CF}_3\text{I} \cdots \text{selenophene} (\perp)$  |        |        |        |        |
| 5.2                                                      | 12.5   | 27.9   | 31.7   | 46.1   |
| 75.7                                                     | 267.4  | 268.5  | 286.7  | 409.3  |
| 468.1                                                    | 538.9  | 540.5  | 564.1  | 649.7  |
| 707.7                                                    | 727.3  | 752.9  | 789.3  | 836.8  |
| 907.1                                                    | 944.1  | 1047.7 | 1087.1 | 1097.1 |
| 1101.5                                                   | 1192.4 | 1194.3 | 1268.0 | 1382.1 |
| 1477.1                                                   | 1570.3 | 3206.9 | 3221.4 | 3261.1 |
| 3264.0                                                   |        |        |        |        |
